# Supplementary material for: Molecular links between cellular senescence, longevity and age-related diseases – a systems biology perspective
Source: Aging (Albany NY). 2011 Dec 18;3(12):1178–91. doi: 10.18632/aging.100413 (PMC3273898; doi:10.18632/aging.100413)
Supplement: Supplementary Table 1 [file aging-03-1178-s001.xls]

## Sheet: Suppl. Table 1
Supplementary Table 1. List of CS-associated genes.
Gene name	HGNC ID	Method/Observation	PubMed ID
ABI3BP	17265	RNA interference	19338757
AGT	333	Knockout or overexpression	16908765
AGTRAP	13539	Overexpression	19769983
ALOX15B	434	Overexpression	17164141
ANGPT1	484	Stimulation with ANGPT1	20453494
ARID3A	3031	Overexpression	11812999
ASF1A	20995	Knockout	15621527
ATM	795	Knockout	9312059
ATR	882	Overexpression	18245444
AURKA	11393	Overexpression	18372918
BACH1	935	Knockout	21110788
BCL2	990	Immunofluorescence	7757977
BCL6	1001	RNA interference	11914273
BHLHB2	1046	Overexpression	18025081
BLVRA	1062	RNA interference	21099244
BMI1	1066	Knockout or overexpression	12482990
BMP4	1071	Stimulation with BMP4	12959928
BRAF	1097	Overexpression	16079850
BRCA1	1100	Mutations	19372557
BRCA2	1101	Mutations	9699678
BRD7	14310	RNA interference or overexpression	20660729
BTG1	1130	DNA microarray	11752408
BTG2	1131	DNA microarray	11752408
BUB1B	1149	Knockout	15208629
C2orf40	24642	Knockout or overexpression	20404145
CASP3	1504	qPCR, Caspase activity assay	15541772
CAV1	1527	RNA interference	15263006
CBX7	1557	RNA interference	14647293
CBX8	15962	Overexpression	17332741
CCND1	1582	Overexpression	7698220
CD28	1653	Loss of expression	9463780
CD82	6210	Yeast two-hybrid screen	16862154
CDK2	1771	Knockout	20010815
CDK4	1773	Overexpression	12082615
CDK6	1777	Overexpression	12082615
CDKN1A	1784	Knockout	9242615
CDKN1B	1785	Overexpression	9512419
CDKN1C	1786	Overexpression	10980131
CDKN2A	1787	Overexpression	9607312
CDKN2AIP	24325	Overexpression	19001376
CDKN2B	1788	Overexpression	10939591
CEBPB	1834	Knockout or overexpression	16107878
CENPA	1851	RNA interference	20160010
CHD5	16816	Knockout	17289567
CHEK1	1925	Knockout	20716119
CHEK2	16627	Knockout	16675955
CLU	2095	Overexpression	11741605
CPEB1	21744	Knockout or overexpression	19141477
CSNK2A1	2457	RNA interference	16442104
CTSK	2536	Knockout	17210673
CXCL1	4602	Overexpression	17060621
CYR61	2654	Overexpression	20526329
DDB2	2718	Knockout	20351176
DEK	2768	Overexpression	16254365
DHCR24	2859	Mutations	15577914
DKC1	2890	Mutations	20453831
DNAJA3	11808	Genetic screen	15572682
DUSP3	3069	RNA interference	16604064
E2F1	3113	Overexpression	10594030
EGR1	3238	Knockout	12629205
EHF	3246	Overexpression	17627613
EIF4E	3287	Overexpression	15098029
ENDOG	3346	RNA interference	20211237
ERCC1	3433	Knockout	9197240
ERCC4	3436	Knockout	17183314
ESR2	3468	Bisulphite sequencing	17110088
ETS1	3488	Overexpression	11234019
ETS2	3489	Overexpression	11234019
EWSR1	3508	Knockout	21030557
EZH2	3527	qPCR	19462008
FBXO31	16510	Overexpression	16357137
FGF1	3665	Stimulation with FGF1	8707855
FGF2	3676	Stimulation with FGF2	17532297
FGFR3	3690	Overexpression	20362703
FOS	3796	Overexpression	1560044
FOXM1	3818	RNA interference	19235838
FOXO3	3821	RNA interference	15741276
G6PD	4057	Knockout	14980702
GADD45A	4095	Knockout	10508513
GCLM	4312	Knockout	19427898
GJA1	4274	Knockout or overexpression	16675599
GLB1	4298	RNA interference	16626397
GNG11	4403	Knockout or overexpression	17092487
GNL3	29931	Overexpression	17000763
GPX1	4553	Knockout	14732290
H2AFX	4739	Immunofluorescence	15172978
HELLS	4861	Knockout	15611660
HEPACAM	26361	Overexpression	18845560
HIRA	4916	Immunofluorescence	15621527
HIVEP1	4920	RNA interference	18852884
HMGA2	5009	Immunofluorescence	16901784
HRAS	5173	Overexpression	9054499
HSPA1A	5232	Northern blot, Western blot	9637782
HSPA9B	5244	Overexpression	7693662
HSPB2	5247	RNA interference or overexpression	18089808
ICAM1	5344	Overexpression	15247038
ID1	5360	Overexpression	12177246
IFNB1	5434	Stimulation with interferon beta	16436515
IFNG	5438	Overexpression	19071156
IGF1	5464	Overexpression	10962000
IGFBP1	5469	qPCR, Western blot	11089538
IGFBP2	5471	qPCR ,Western blot	11089538
IGFBP3	5472	RNA interference	18329388
IGFBP5	5474	Knockout or overexpression	17804819
IGFBP6	5475	DNA microarray	19053174
IGFBP7	5476	Stimulation with IGFBP7	18267069
IL15	5977	Overexpression	15778359
IL1A	5991	Knockout	2218499
IL1B	5992	qPCR	15388329
IL1RN	6000	qPCR	15388329
IL8	6025	Overexpression	18555777
ILK	6040	Overexpression	17234816
ING1	6062	Overexpression	18691180
ING2	6063	Knockout or overexpression	16024799
IRF3	6118	Overexpression	16513254
IRF5	6120	Overexpression	18505922
IRF7	6122	Overexpression	18505922
ITGB4	6158	RNA interference	17964297
JDP2	17546	Knockout	19233846
JUND	6206	Knockout	11106750
KCNJ12	6258	Knockout	20841375
KIAA1524	29302	RNA interference	18559589
KL	6344	RNA interference	17014852
KRAS	6407	Stimulation with KRAS	15492501
LEO1	30401	Overexpression	15791002
LIG4	6601	Knockout	9823897
LMNA	6636	qPCR	20458013
LMNB1	6637	Knockout	15232008
LOXL2	6666	DNA microarray	15963989
MAP2K1	6840	Overexpression	14701721
MAP2K2	6842	Overexpression	9765203
MAP2K6	6846	Overexpression	12208764
MAP2K7	6847	Knockout	15039780
MAPK1	6871	Immunohistochemistry	12840032
MAPKAPK5	6889	Knockout	17254968
MARCH5	26025	RNA interference	20103533
MDM2	6973	Overexpression	19132120
MECP2	6990	RNA interference	20065105
MMP2	7166	Western blot	12704538
MMP9	7176	RNA interference	17510426
MORC3	23572	Overexpression	17332504
MORF4	15773	Overexpression	9891081
MOS	7199	Overexpression	8020593
MRE11A	7230	Western blot	17202845
MST1R	7381	Overexpression	17588532
MXD4	13906	Overexpression	12761891
MYC	7553	Overexpression	9521854
NEK6	7749	Overexpression	21099361
NFE2L2	7782	Knockout	20068043
NFYA	7804	Mutations	11707903
NINJ1	7824	Overexpression	15464245
NOX4	7891	Overexpression	20523116
NPM1	7910	Overexpression	17546053
NR4A3	7982	DNA microarray	15574883
NUAK1	14311	Knockout or overexpression	19927127
OCLN	8104	Overexpression	17459053
OTX2	8522	Overexpression	21047732
PBRM1	30064	RNA interference	20660729
PCGF2	12929	Overexpression	17151361
PCNA	8729	Northern	1364114
PDZD2	18486	Overexpression	18639375
PER2	8846	Mutations	18981300
PEX19	9713	Overexpression	17389721
PHLDA1	8933	DNA microarray	15574883
PIAS4	17002	Overexpression	16793547
PIM1	8986	Overexpression	20647331
PLA2G2A	9031	Stimulation with PLA2G2A	19264704
PLA2R1	9042	Knockout or overexpression	19197340
PML	9113	Overexpression	10910364
PNPT1	23166	Overexpression	16055741
POT1	17284	RNA interference	15657433
POU1F1	9210	Knockout	11371619
PPM1D	9277	Overexpression	19544416
PPP1CA	9281	RNA interference	18204081
PPP1R15A	14375	Knockout	17487408
PRDX2	9353	Knockout	16109412
PRKCD	9399	RNA interference	19279193
PRPF19	17896	Overexpression	16388800
PSAP	9498	qPCR	19471889
PSMD14	16889	RNA interference	19732767
PTEN	9588	Knockout	20197621
PTTG1	9690	Overexpression	20452981
RAB27B	9767	Northern blot	16620919
RAC1	9801	Knockout or overexpression	17032649
RAF1	9829	Overexpression	9765202
RB1	9884	qPCR	19099372
RBP2	9920	Knockout	19850045
RBX1	9928	RNA interference	19509229
RNASEL	10050	Knockout or overexpression	17130839
RPLP1	10372	Overexpression	19233166
RPS6KA6	10435	Overexpression	19584160
RSL1D1	24534	Knockout or overexpression	18678645
RUNX1	10471	Overexpression	19448675
RUVBL2	10475	Knockout	20346530
S100A6	10496	Knockout	20013795
SENP1	17927	RNA interference	18616636
SENP2	23116	RNA interference	18616636
SENP7	30402	RNA interference	18616636
SERPINB5	8949	Immunofluorescence	15126325
SERPINE1	8583	RNA interference	16862142
SERTAD1	17932	Stimulation with SERTAD1	19903772
SFN	10773	Overexpression	19642975
SHC1	10840	qPCR	15302571
SIN3B	19354	Knockout or overexpression	19654306
SIRT1	14929	Overexpression	18320031
SKIL	10897	Overexpression	19745809
SKP2	10901	Knockout	20237562
SLC13A3	14430	Overexpression	20813124
SMARCA4	11100	RNA interference	20697355
SMARCB1	11103	Overexpression	14604992
SMURF2	16809	Overexpression	15574587
SOCS1	19383	RNA interference	20005840
SOD1	11179	RNA interference	12871978
SOX5	11201	Overexpression	19219070
SP1	11205	Overexpression	17225865
SP100	11206	Knockout	21118961
SPIN1	11243	Overexpression	18201843
SRC	11283	Overexpression	16204065
SREBF1	11289	Overexpression	20615871
STAC	11353	DNA microarray	15574883
STAT5B	11367	Overexpression	20536843
STK11	11389	Knockout	12226664
STUB1	11427	Overexpression	20974249
SUPT5H	1469	Knockout	19210550
SUZ12	17101	Immunofluorescence	20049504
SYK	11491	Overexpression	19293188
TACC3	11524	Knockout	20729911
TADA3	19422	Overexpression	17452980
TAGLN	11553	Overexpression	8706785
TBX2	11597	Overexpression	15781639
TBX3	11602	RNA interference	11748239
TCEB3	11620	RNA interference	17170753
TERF1	11728	Knockout	19679647
TERF2	11729	Knockout	16539655
TERT	11730	Flow cytometry	12496279
TGFA	11765	Overexpression	12593448
TGFB1	11766	qPCR	11060295
TGFB1I1	11767	Knockout or overexpression	9032249
TGFB2	11768	Stimulation with TGFB2	19171648
TMPRSS11A	27954	Overexpression	16380648
TNFSF13	11928	RNA interference	19466596
TNFSF15	11931	Knockout or overexpression	20675618
TOP1	11986	Knockout	19435923
TP53	11998	Overexpression	7667293
TP53BP1	11999	Knockout	19716796
TP63	15979	Knockout	19898465
TP73	12003	Overexpression	11593387
TXN	12435	RNA interference	20074557
TXNIP	16952	Knockout or overexpression	20656682
VEGFA	12680	Overexpression	9160882
VHL	12687	RNA interference	18297059
WNT16	16267	RNA interference	19951988
WNT2	12780	RNA interference	17643369
WNT3A	15983	Stimulation with WNT3A	17643369
WRN	12791	Knockout	16264192
WT1	12796	Knockout	20972333
XRCC5	12833	Knockout	19079133
YBX1	8014	Knockout	15899865
YPEL3	18327	Overexpression	20388804
ZFP36	12862	Overexpression	20157568
ZMPSTE24	12877	Knockout	16079796
ZNF148	12933	Knockout	19583777
