# Supplementary material for: Molecular links between cellular senescence, longevity and age-related diseases – a systems biology perspective
Source: Aging (Albany NY). 2011 Dec 18;3(12):1178–91. doi: 10.18632/aging.100413 (PMC3273898; doi:10.18632/aging.100413)
Supplement: Supplementary Table 2 [file aging-03-1178-s002.xls]

## Sheet: Suppl. Table 2
Supplementary Table 2. List of enriched GO terms among CS-associated genes.
GO Accession	Go Term	CS genes (%)	P-value	Bonferroni	Fold Enrichment
GO:0042127	regulation of cell proliferation	34.0996	8.37e-46	2.25637e-42	6.047
GO:0008285	negative regulation of cell proliferation	21.0728	8.03e-34	2.16652e-30	8.146
GO:0051726	regulation of cell cycle	19.1571	1.95e-30	5.25673e-27	8.077
GO:0010941	regulation of cell death	27.9693	3.83e-30	1.03205e-26	4.789
GO:0043067	regulation of programmed cell death	27.5862	2.04e-29	5.49046e-26	4.741
GO:0007569	cell aging	8.42912	5.86e-29	1.58145e-25	35.647
GO:0042981	regulation of apoptosis	27.2031	7.3e-29	1.96764e-25	4.722
GO:0007568	aging	12.2605	2.09e-28	5.6409e-25	15.555
GO:0010604	positive regulation of macromolecule metabolic process	26.8199	2.19e-26	5.89542e-23	4.367
GO:0007049	cell cycle	24.9042	5.82e-25	1.57083e-21	4.479
GO:0033554	cellular response to stress	20.6897	3.99e-23	1.07503e-19	5.101
GO:0009891	positive regulation of biosynthetic process	22.2222	4.88e-22	1.3159e-18	4.462
GO:0040008	regulation of growth	16.092	5.75e-22	1.55196e-18	6.586
GO:0031328	positive regulation of cellular biosynthetic process	21.8391	1.4e-21	3.78882e-18	4.449
GO:0006974	response to DNA damage stimulus	16.4751	2.19e-21	5.89757e-18	6.164
GO:0043066	negative regulation of apoptosis	16.092	2.38e-21	6.4209e-18	6.344
GO:0051173	positive regulation of nitrogen compound metabolic process	21.0728	2.61e-21	7.04977e-18	4.567
GO:0043069	negative regulation of programmed cell death	16.092	4.04e-21	1.09003e-17	6.256
GO:0060548	negative regulation of cell death	16.092	4.49e-21	1.21042e-17	6.238
GO:0010557	positive regulation of macromolecule biosynthetic process	21.0728	5.33e-21	1.43838e-17	4.497
GO:0008284	positive regulation of cell proliferation	16.8582	1.62e-20	4.37883e-17	5.683
GO:0045935	positive regulation of nucleobase, nucleoside, nucleotide and nucleic acid metabolic process	20.3065	2.14e-20	5.76321e-17	4.542
GO:0010605	negative regulation of macromolecule metabolic process	21.8391	3.71e-20	9.99358e-17	4.152
GO:0022402	cell cycle process	19.1571	5.92e-20	1.59733e-16	4.732
GO:0006357	regulation of transcription from RNA polymerase II promoter	21.0728	6.55e-19	1.76778e-15	4.045
GO:0008283	cell proliferation	16.4751	7.96e-19	2.14614e-15	5.273
GO:0051172	negative regulation of nitrogen compound metabolic process	17.6245	2.41e-18	6.49582e-15	4.739
GO:0045449	regulation of transcription	41.7625	2.43e-18	6.54412e-15	2.241
GO:0010942	positive regulation of cell death	16.092	4.76e-18	1.28285e-14	5.163
GO:0045934	negative regulation of nucleobase, nucleoside, nucleotide and nucleic acid metabolic process	17.2414	8.42e-18	2.27192e-14	4.7
GO:0043065	positive regulation of apoptosis	15.7088	2e-17	5.40719e-14	5.098
GO:0001558	regulation of cell growth	11.1111	2.35e-17	6.34542e-14	7.993
GO:0043068	positive regulation of programmed cell death	15.7088	2.56e-17	6.89133e-14	5.063
GO:0006259	DNA metabolic process	16.8582	3.14e-17	8.48047e-14	4.65
GO:0045941	positive regulation of transcription	17.6245	5.79e-17	2.99427e-13	4.361
GO:0010628	positive regulation of gene expression	17.6245	1.77e-16	5.98854e-13	4.233
GO:0010033	response to organic substance	19.5402	3.78e-16	8.98281e-13	3.782
GO:0042325	regulation of phosphorylation	15.7088	4.33e-16	1.19771e-12	4.704
GO:0009890	negative regulation of biosynthetic process	17.2414	6.59e-16	1.79656e-12	4.199
GO:0007346	regulation of mitotic cell cycle	9.57854	7.27e-16	2.09599e-12	8.794
GO:0051254	positive regulation of RNA metabolic process	15.7088	1.17e-15	3.2937e-12	4.558
GO:0019220	regulation of phosphate metabolic process	15.7088	1.47e-15	3.89255e-12	4.52
GO:0051174	regulation of phosphorus metabolic process	15.7088	1.47e-15	3.89255e-12	4.52
GO:0031327	negative regulation of cellular biosynthetic process	16.8582	1.64e-15	4.49141e-12	4.194
GO:0051252	regulation of RNA metabolic process	31.8008	2.58e-15	6.88682e-12	2.448
GO:0007050	cell cycle arrest	8.04598	3.11e-15	8.38396e-12	10.902
GO:0010558	negative regulation of macromolecule biosynthetic process	16.4751	3.42e-15	9.28224e-12	4.203
GO:0045893	positive regulation of transcription, DNA-dependent	15.3257	4.81e-15	1.28754e-11	4.484
GO:0006355	regulation of transcription, DNA-dependent	31.0345	7.59e-15	2.0361e-11	2.443
GO:0051338	regulation of transferase activity	13.41	1.25e-14	3.38353e-11	5.031
GO:0048545	response to steroid hormone stimulus	9.96169	1.68e-14	4.55129e-11	7.241
GO:0051052	regulation of DNA metabolic process	8.04598	2.41e-14	6.49757e-11	9.85
GO:0010629	negative regulation of gene expression	15.3257	2.91e-14	7.84499e-11	4.244
GO:0051276	chromosome organization	14.9425	4.37e-14	1.17675e-10	4.3
GO:0009628	response to abiotic stimulus	13.0268	5.5e-14	1.48516e-10	4.94
GO:0048534	hemopoietic or lymphoid organ development	11.1111	5.52e-14	1.48815e-10	5.964
GO:0030308	negative regulation of cell growth	7.27969	6.83e-14	1.84148e-10	11.043
GO:0043549	regulation of kinase activity	12.6437	1.39e-13	3.74284e-10	4.943
GO:0045926	negative regulation of growth	7.66284	1.47e-13	3.96741e-10	9.722
GO:0006468	protein amino acid phosphorylation	17.2414	1.56e-13	4.20695e-10	3.607
GO:0051253	negative regulation of RNA metabolic process	12.6437	2.04e-13	5.49748e-10	4.874
GO:0016481	negative regulation of transcription	14.1762	2.13e-13	5.73403e-10	4.31
GO:0002520	immune system development	11.1111	2.49e-13	6.71316e-10	5.618
GO:0045792	negative regulation of cell size	7.27969	2.6e-13	7.02456e-10	10.262
GO:0030097	hemopoiesis	10.3448	2.72e-13	7.33896e-10	6.117
GO:0051094	positive regulation of developmental process	11.1111	2.98e-13	8.03064e-10	5.578
GO:0045859	regulation of protein kinase activity	12.2605	3.23e-13	8.70734e-10	4.96
GO:0051329	interphase of mitotic cell cycle	7.27969	5.32e-13	1.43575e-09	9.863
GO:0008361	regulation of cell size	9.57854	6.92e-13	1.86513e-09	6.489
GO:0045892	negative regulation of transcription, DNA-dependent	12.2605	7.47e-13	2.01395e-09	4.806
GO:0051325	interphase	7.27969	8.9e-13	2.40171e-09	9.584
GO:0045786	negative regulation of cell cycle	6.51341	1.49e-12	4.0222e-09	11.222
GO:0012501	programmed cell death	15.7088	2.97e-12	8.01806e-09	3.588
GO:0006281	DNA repair	10.728	3.22e-12	8.6747e-09	5.272
GO:0045597	positive regulation of cell differentiation	9.57854	6.94e-12	1.87256e-08	5.837
GO:0009725	response to hormone stimulus	11.8774	9.03e-12	2.43635e-08	4.517
GO:0007242	intracellular signaling cascade	22.9885	1.55e-11	4.16922e-08	2.554
GO:0016310	phosphorylation	17.6245	1.99e-11	5.37026e-08	3.075
GO:0008219	cell death	16.4751	3.15e-11	8.50672e-08	3.198
GO:0006915	apoptosis	14.9425	3.28e-11	8.84975e-08	3.464
GO:0006916	anti-apoptosis	8.81226	3.75e-11	1.01086e-07	5.97
GO:0022403	cell cycle phase	12.2605	3.78e-11	1.01912e-07	4.133
GO:0016265	death	16.4751	3.92e-11	1.05686e-07	3.176
GO:0032535	regulation of cellular component size	9.96169	4.13e-11	1.11454e-07	5.13
GO:0051270	regulation of cell motion	8.42912	7.47e-11	2.01426e-07	6.095
GO:0043627	response to estrogen stimulus	6.51341	9.33e-11	2.51762e-07	8.657
GO:0009719	response to endogenous stimulus	11.8774	1.05e-10	2.83144e-07	4.093
GO:0006796	phosphate metabolic process	19.1571	1.12e-10	3.02606e-07	2.748
GO:0006793	phosphorus metabolic process	19.1571	1.12e-10	3.02606e-07	2.748
GO:0000075	cell cycle checkpoint	6.13027	1.16e-10	3.11923e-07	9.401
GO:0009314	response to radiation	8.42912	1.46e-10	3.94918e-07	5.882
GO:0000122	negative regulation of transcription from RNA polymerase II promoter	9.57854	1.64e-10	4.4334e-07	5.025
GO:0042770	DNA damage response, signal transduction	5.74713	2.13e-10	5.75376e-07	10.026
GO:0000079	regulation of cyclin-dependent protein kinase activity	4.98084	2.3e-10	6.21656e-07	12.872
GO:0044093	positive regulation of molecular function	14.1762	2.46e-10	6.64124e-07	3.376
GO:0000278	mitotic cell cycle	11.1111	2.83e-10	7.62551e-07	4.191
GO:0045944	positive regulation of transcription from RNA polymerase II promoter	11.1111	2.99e-10	8.06785e-07	4.18
GO:0010564	regulation of cell cycle process	6.51341	3.31e-10	8.93194e-07	7.974
GO:0032844	regulation of homeostatic process	6.51341	3.31e-10	8.93194e-07	7.974
GO:0045787	positive regulation of cell cycle	4.98084	4.52e-10	1.21995e-06	12.195
GO:0050678	regulation of epithelial cell proliferation	5.36398	5.31e-10	1.433e-06	10.543
GO:0032268	regulation of cellular protein metabolic process	12.2605	1.1e-09	2.97671e-06	3.61
GO:0006917	induction of apoptosis	9.96169	1.4e-09	3.78306e-06	4.344
GO:0012502	induction of programmed cell death	9.96169	1.5e-09	4.03721e-06	4.331
GO:0051348	negative regulation of transferase activity	5.74713	2.6e-09	7.00441e-06	8.355
GO:0043085	positive regulation of catalytic activity	12.6437	2.6e-09	7.00963e-06	3.393
GO:0044092	negative regulation of molecular function	9.96169	3.39e-09	9.15371e-06	4.162
GO:0051272	positive regulation of cell motion	5.74713	3.43e-09	9.23911e-06	8.184
GO:0008629	induction of apoptosis by intracellular signals	4.5977	3.56e-09	9.59338e-06	11.882
GO:0051098	regulation of binding	6.89655	3.68e-09	9.93487e-06	6.291
GO:0045596	negative regulation of cell differentiation	8.04598	3.75e-09	1.01207e-05	5.199
GO:0010638	positive regulation of organelle organization	5.36398	3.97e-09	1.06977e-05	9.019
GO:0033043	regulation of organelle organization	8.04598	4.07e-09	1.09645e-05	5.175
GO:0051247	positive regulation of protein metabolic process	8.42912	5.23e-09	1.41019e-05	4.841
GO:0051090	regulation of transcription factor activity	5.74713	6.65e-09	1.79375e-05	7.787
GO:0031399	regulation of protein modification process	9.1954	6.89e-09	1.85814e-05	4.35
GO:0009967	positive regulation of signal transduction	9.1954	6.89e-09	1.85814e-05	4.35
GO:0016568	chromatin modification	8.81226	8.7e-09	2.34765e-05	4.488
GO:0006325	chromatin organization	10.3448	9.53e-09	2.56962e-05	3.819
GO:0050680	negative regulation of epithelial cell proliferation	3.44828	1.07e-08	2.87847e-05	19.249
GO:0048145	regulation of fibroblast proliferation	3.83142	1.08e-08	2.92219e-05	15.277
GO:0043523	regulation of neuron apoptosis	5.36398	1.1e-08	2.96046e-05	8.318
GO:0045137	development of primary sexual characteristics	6.13027	1.36e-08	3.65455e-05	6.736
GO:0032270	positive regulation of cellular protein metabolic process	8.04598	1.38e-08	3.71905e-05	4.819
GO:0010608	posttranscriptional regulation of gene expression	7.66284	1.48e-08	3.98208e-05	5.068
GO:0006275	regulation of DNA replication	4.5977	1.66e-08	4.4662e-05	10.349
GO:0040012	regulation of locomotion	7.27969	1.91e-08	5.15676e-05	5.291
GO:0000723	telomere maintenance	3.44828	2.92e-08	7.88086e-05	17.187
GO:0051053	negative regulation of DNA metabolic process	3.83142	3.05e-08	8.21786e-05	13.71
GO:0006350	transcription	28.3525	3.6e-08	9.70775e-05	1.883
GO:0030155	regulation of cell adhesion	6.13027	3.82e-08	0.000103018	6.245
GO:0032200	telomere organization	3.44828	3.97e-08	0.000107088	16.594
GO:0048872	homeostasis of number of cells	5.36398	4.03e-08	0.000108579	7.486
GO:0051130	positive regulation of cellular component organization	6.89655	4.67e-08	0.000125957	5.317
GO:0010647	positive regulation of cell communication	9.1954	5.29e-08	0.000142689	3.901
GO:0046545	development of primary female sexual characteristics	4.5977	5.3e-08	0.000142843	9.299
GO:0046660	female sex differentiation	4.5977	5.3e-08	0.000142843	9.299
GO:0031960	response to corticosteroid stimulus	4.98084	5.3e-08	0.000143003	8.178
GO:0042592	homeostatic process	14.5594	5.31e-08	0.000143213	2.706
GO:0051101	regulation of DNA binding	5.74713	5.43e-08	0.00014648	6.629
GO:0031647	regulation of protein stability	3.83142	6.11e-08	0.000164676	12.731
GO:0032845	negative regulation of homeostatic process	3.06513	6.66e-08	0.000179736	20.37
GO:0060249	anatomical structure homeostasis	5.36398	8.16e-08	0.000220058	7.062
GO:0048608	reproductive structure development	5.74713	9.1e-08	0.000245476	6.366
GO:0006260	DNA replication	6.89655	9.53e-08	0.000257085	5.066
GO:0033673	negative regulation of kinase activity	4.98084	1.02e-07	0.000274143	7.723
GO:0030334	regulation of cell migration	6.51341	1.05e-07	0.000282902	5.379
GO:0007167	enzyme linked receptor protein signaling pathway	9.1954	1.07e-07	0.000288775	3.752
GO:0042326	negative regulation of phosphorylation	3.83142	1.16e-07	0.000311681	11.882
GO:0009411	response to UV	4.21456	1.19e-07	0.000319888	9.969
GO:0008630	DNA damage response, signal transduction resulting in induction of apoptosis	3.44828	1.2e-07	0.000324742	14.583
GO:0010212	response to ionizing radiation	4.21456	1.4e-07	0.000377632	9.803
GO:0007548	sex differentiation	6.13027	1.41e-07	0.000379377	5.666
GO:0009991	response to extracellular stimulus	7.27969	1.55e-07	0.000418382	4.618
GO:0001568	blood vessel development	7.66284	1.62e-07	0.000436073	4.365
GO:0051384	response to glucocorticoid stimulus	4.5977	1.95e-07	0.000525439	8.226
GO:0010563	negative regulation of phosphorus metabolic process	3.83142	2.08e-07	0.000561744	11.14
GO:0000077	DNA damage checkpoint	3.83142	2.08e-07	0.000561744	11.14
GO:0045936	negative regulation of phosphate metabolic process	3.83142	2.08e-07	0.000561744	11.14
GO:0048732	gland development	5.74713	2.17e-07	0.000585102	5.941
GO:0001944	vasculature development	7.66284	2.37e-07	0.00063835	4.261
GO:0043086	negative regulation of catalytic activity	8.04598	2.42e-07	0.000653234	4.054
GO:0040017	positive regulation of locomotion	4.98084	2.64e-07	0.000712519	7.093
GO:0048146	positive regulation of fibroblast proliferation	3.06513	3.48e-07	0.000938563	16.452
GO:0050670	regulation of lymphocyte proliferation	4.5977	3.73e-07	0.00100422	7.731
GO:0070663	regulation of leukocyte proliferation	4.5977	4.22e-07	0.00113666	7.639
GO:0032944	regulation of mononuclear cell proliferation	4.5977	4.22e-07	0.00113666	7.639
GO:0031401	positive regulation of protein modification process	6.51341	4.23e-07	0.0011394	4.861
GO:0031570	DNA integrity checkpoint	3.83142	4.28e-07	0.00115447	10.283
GO:0048514	blood vessel morphogenesis	6.89655	4.31e-07	0.00116217	4.561
GO:0051781	positive regulation of cell division	3.44828	4.84e-07	0.0013058	12.339
GO:0031099	regeneration	4.21456	5.45e-07	0.00146947	8.524
GO:0051347	positive regulation of transferase activity	7.27969	5.67e-07	0.00152704	4.233
GO:0006469	negative regulation of protein kinase activity	4.5977	6.05e-07	0.00163109	7.375
GO:0051249	regulation of lymphocyte activation	5.74713	6.75e-07	0.00181995	5.419
GO:0051789	response to protein stimulus	4.98084	6.95e-07	0.0018737	6.496
GO:0030335	positive regulation of cell migration	4.5977	7.64e-07	0.0020579	7.209
GO:0051054	positive regulation of DNA metabolic process	3.83142	8.27e-07	0.00222666	9.548
GO:0031667	response to nutrient levels	6.51341	8.48e-07	0.00228451	4.614
GO:0007004	telomere maintenance via telomerase	2.29885	9.09e-07	0.00244839	29.166
GO:0046649	lymphocyte activation	6.51341	9.76e-07	0.00262985	4.568
GO:0007093	mitotic cell cycle checkpoint	3.44828	1.07e-06	0.00288355	11.191
GO:0019216	regulation of lipid metabolic process	4.98084	1.14e-06	0.00307314	6.206
GO:0008406	gonad development	4.98084	1.14e-06	0.00307314	6.206
GO:0008637	apoptotic mitochondrial changes	3.06513	1.29e-06	0.00346057	13.799
GO:0033674	positive regulation of kinase activity	6.89655	1.53e-06	0.0041174	4.167
GO:0032204	regulation of telomere maintenance	2.29885	1.53e-06	0.00413002	26.735
GO:0010833	telomere maintenance via telomere lengthening	2.29885	1.53e-06	0.00413002	26.735
GO:0007243	protein kinase cascade	8.81226	1.65e-06	0.0044412	3.324
GO:0040007	growth	6.13027	1.69e-06	0.00453615	4.675
GO:0000086	G2/M transition of mitotic cell cycle	2.68199	1.69e-06	0.0045463	17.823
GO:0001836	release of cytochrome c from mitochondria	2.68199	1.69e-06	0.0045463	17.823
GO:0001302	replicative cell aging	1.91571	1.71e-06	0.00460902	44.559
GO:0070647	protein modification by small protein conjugation or removal	5.74713	1.73e-06	0.00466205	5.013
GO:0009416	response to light stimulus	5.36398	1.78e-06	0.00480054	5.425
GO:0050863	regulation of T cell activation	4.98084	1.82e-06	0.00490681	5.941
GO:0022602	ovulation cycle process	3.83142	2.01e-06	0.00540094	8.624
GO:0042129	regulation of T cell proliferation	3.83142	2.01e-06	0.00540094	8.624
GO:0006302	double-strand break repair	3.83142	2.01e-06	0.00540094	8.624
GO:0051302	regulation of cell division	3.44828	2.18e-06	0.00585474	10.239
GO:0043405	regulation of MAP kinase activity	5.36398	2.27e-06	0.00611633	5.309
GO:0051271	negative regulation of cell motion	3.83142	2.3e-06	0.00619728	8.487
GO:0000060	protein import into nucleus, translocation	3.06513	2.51e-06	0.00673878	12.581
GO:0008585	female gonad development	3.83142	2.64e-06	0.00709224	8.355
GO:0002694	regulation of leukocyte activation	5.74713	2.68e-06	0.00721505	4.832
GO:0042493	response to drug	6.51341	2.87e-06	0.00772268	4.208
GO:0045321	leukocyte activation	6.89655	2.9e-06	0.00780108	3.977
GO:0043406	positive regulation of MAP kinase activity	4.5977	3.01e-06	0.00808761	6.291
GO:0030217	T cell differentiation	3.83142	3.01e-06	0.00809562	8.226
GO:0042698	ovulation cycle	3.83142	3.9e-06	0.0104706	7.981
GO:0001525	angiogenesis	5.36398	3.91e-06	0.0104959	5.058
GO:0006310	DNA recombination	4.5977	4.01e-06	0.0107536	6.111
GO:0043524	negative regulation of neuron apoptosis	3.44828	4.13e-06	0.0110881	9.436
GO:0050864	regulation of B cell activation	3.44828	4.13e-06	0.0110881	9.436
GO:0052547	regulation of peptidase activity	4.21456	4.3e-06	0.0115369	6.839
GO:0045860	positive regulation of protein kinase activity	6.51341	4.34e-06	0.0116378	4.076
GO:0001932	regulation of protein amino acid phosphorylation	5.74713	4.36e-06	0.0116999	4.636
GO:0048589	developmental growth	4.21456	4.78e-06	0.0128162	6.761
GO:0006997	nucleus organization	3.44828	4.81e-06	0.0128836	9.254
GO:0050865	regulation of cell activation	5.74713	4.99e-06	0.0133707	4.583
GO:0001934	positive regulation of protein amino acid phosphorylation	4.21456	5.88e-06	0.0157437	6.609
GO:0009611	response to wounding	10.3448	6.43e-06	0.0171967	2.724
GO:0032355	response to estradiol stimulus	3.44828	6.44e-06	0.017212	8.912
GO:0000737	DNA catabolic process, endonucleolytic	2.68199	6.63e-06	0.0177196	14.396
GO:0001775	cell activation	7.27969	7.24e-06	0.0193448	3.54
GO:0050671	positive regulation of lymphocyte proliferation	3.44828	7.41e-06	0.0197949	8.75
GO:0032205	negative regulation of telomere maintenance	1.91571	7.76e-06	0.020714	33.419
GO:0003006	reproductive developmental process	6.89655	8.37e-06	0.0223257	3.674
GO:0070665	positive regulation of leukocyte proliferation	3.44828	8.51e-06	0.0226927	8.593
GO:0032946	positive regulation of mononuclear cell proliferation	3.44828	8.51e-06	0.0226927	8.593
GO:0000082	G1/S transition of mitotic cell cycle	3.44828	8.51e-06	0.0226927	8.593
GO:0048584	positive regulation of response to stimulus	6.51341	8.94e-06	0.0238286	3.852
GO:0001763	morphogenesis of a branching structure	3.83142	9.01e-06	0.0239993	7.226
GO:0002684	positive regulation of immune system process	6.51341	9.91e-06	0.0263791	3.819
GO:0008156	negative regulation of DNA replication	2.68199	1.05e-05	0.0279573	13.368
GO:0045165	cell fate commitment	4.98084	1.1e-05	0.0293482	5.001
GO:0006278	RNA-dependent DNA replication	2.29885	1.11e-05	0.029512	18.872
GO:0031575	G1/S transition checkpoint	2.29885	1.11e-05	0.029512	18.872
GO:0007584	response to nutrient	4.98084	1.19e-05	0.0315412	4.965
GO:0006979	response to oxidative stress	5.36398	1.21e-05	0.0319831	4.565
GO:0042327	positive regulation of phosphorylation	4.21456	1.28e-05	0.0338654	6.064
GO:0051251	positive regulation of lymphocyte activation	4.21456	1.28e-05	0.0338654	6.064
GO:0030856	regulation of epithelial cell differentiation	2.68199	1.31e-05	0.0345863	12.907
GO:0032504	multicellular organism reproduction	9.57854	1.39e-05	0.0369067	2.745
GO:0048609	reproductive process in a multicellular organism	9.57854	1.39e-05	0.0369067	2.745
GO:0051091	positive regulation of transcription factor activity	3.44828	1.44e-05	0.0380327	8.021
GO:0070661	leukocyte proliferation	3.06513	1.52e-05	0.0402603	9.722
GO:0032943	mononuclear cell proliferation	3.06513	1.52e-05	0.0402603	9.722
GO:0043281	regulation of caspase activity	3.83142	1.55e-05	0.040861	6.768
GO:0034097	response to cytokine stimulus	3.83142	1.55e-05	0.040861	6.768
GO:0014070	response to organic cyclic substance	4.5977	1.58e-05	0.0417417	5.303
GO:0035295	tube development	6.13027	1.6e-05	0.0422386	3.889
GO:0033044	regulation of chromosome organization	2.68199	1.61e-05	0.0423918	12.476
GO:0045937	positive regulation of phosphate metabolic process	4.21456	1.67e-05	0.0441551	5.882
GO:0010562	positive regulation of phosphorus metabolic process	4.21456	1.67e-05	0.0441551	5.882
GO:0009968	negative regulation of signal transduction	6.13027	1.69e-05	0.0445153	3.871
GO:0002697	regulation of immune effector process	4.21456	1.83e-05	0.0481168	5.824
