# Supplementary material for: Molecular links between cellular senescence, longevity and age-related diseases – a systems biology perspective
Source: Aging (Albany NY). 2011 Dec 18;3(12):1178–91. doi: 10.18632/aging.100413 (PMC3273898; doi:10.18632/aging.100413)
Supplement: Supplementary Table 3 [file aging-03-1178-s003.xls]

## Sheet: Suppl. Table 3
Supplementary Table 3. Pathways enriched across CS, ARDs and aging-associated processes.
Pathways	# of sets*	CS	LAGs	AthSc	AD	Type 2 diabetes	Cancer	Oxidative stress	Chronic inflam
		PValue	PValue	PValue	PValue	PValue	PValue	PValue	PValue
Pathways in cancer	8	1.49426e-23	0.00821771	4.48415e-22	7.59434e-06	4.53261e-09	9.06148e-74	4.1299e-18	4.53261e-09
Chronic myeloid leukemia	8	1.49991e-17	0.00102946	3.80779e-09	0.00429641	0.000756429	2.45121e-25	1.55161e-11	0.00351139
Melanoma	8	1.95643e-14	0.00605656	1.88913e-12	0.044993	1.44852e-05	1.70124e-18	5.41024e-11	0.0394435
Pancreatic cancer	8	4.75629e-12	0.0182539	1.9372e-09	0.0137785	0.0116583	1.97189e-25	6.57121e-13	1.64457e-05
Prostate cancer	8	1.79894e-11	3.33101e-06	2.90902e-14	0.000687485	8.49139e-10	1.5833e-26	2.37649e-19	0.00231994
Endometrial cancer	8	1.03158e-08	0.000438234	6.65158e-07	0.00280903	0.0117084	6.26573e-18	2.65488e-11	0.0482394
MAPK signaling pathway	7	4.99251e-10		2.17647e-06	0.0145222	0.00445462	4.98735e-21	2.69988e-13	0.0241032
Acute myeloid leukemia	7	3.86484e-08	0.0342842	0.000450422		0.0182014	8.39253e-17	7.64104e-06	0.0182014
Colorectal cancer	7	3.81064e-07	0.000996326	4.55571e-10	0.000447385	0.00160015	3.40262e-21	1.63096e-12
Neurotrophin signaling pathway	7	1.2552e-06	0.00672517	3.11128e-05		0.016693	1.82781e-20	2.67248e-13	0.00537955
Insulin signaling pathway	7	0.00118963	2.87845e-08	0.0196301	0.0318791	2.76789e-11	5.56573e-11	9.98052e-08
mTOR signaling pathway	7	0.00291115	9.97661e-05	0.00446513	0.013553	5.63582e-05	2.5999e-05	1.76492e-05
Apoptosis	7	0.0329038		0.00791637	0.00963064	0.00200657	3.85214e-08	9.51631e-08	4.55467e-08
Bladder cancer	6	5.49361e-21		3.75803e-10		0.0243875	1.27072e-17	2.43399e-07	0.000748577
p53 signaling pathway	6	6.69512e-20	0.00135729	1.32696e-05		0.00890026	1.02876e-14	6.41405e-06
Glioma	6	1.69081e-15	0.000669474	1.96763e-11		5.82223e-07	3.4195e-15	3.82122e-14
Small cell lung cancer	6	3.81064e-07		0.000116532		0.00160015	3.50165e-14	2.16908e-06	0.00657968
Thyroid cancer	6	7.51758e-07		0.00546089	0.0442849		7.42393e-13	7.30143e-05	0.0404326
Toll-like receptor signaling pathway	6	1.85771e-05		4.41766e-05		0.0172487	1.4114e-08	1.44689e-07	7.29135e-14
Focal adhesion	6	0.000118972		4.57679e-11	0.0219593	0.0171921	7.14395e-17	1.92881e-08
Cell cycle	5	1.50359e-16	1.58894e-05	0.000128919			1.05063e-18	0.000745795
Non-small cell lung cancer	5	7.16239e-12	0.00781529	4.60644e-05			3.82247e-16	5.9955e-09
Renal cell carcinoma	5	4.25435e-09		1.80541e-05		0.00236675	7.56226e-22	1.42335e-06
ErbB signaling pathway	5	7.95102e-08		0.000164425		0.0273398	2.10859e-19	3.05442e-11
Prion diseases	5	3.81088e-05		0.0122797	3.63946e-05		0.00154685	0.000259765
Natural killer cell mediated cytotoxicity	5	6.7735e-05		0.0177453			6.08121e-05	0.00398109	0.00261713
VEGF signaling pathway	5	0.000198771		0.00293799		0.00351139	2.73069e-06	7.58217e-08
Progesterone-mediated oocyte maturation	5	0.000561967	0.000400977			0.0260026	3.98729e-07	8.02799e-08
T cell receptor signaling pathway	5	0.000743115		0.000353918			7.00934e-17	7.13152e-08	2.37592e-05
Chemokine signaling pathway	5	0.00188131		0.00047			8.73961e-10	5.19824e-06	9.29141e-12
Viral myocarditis	5	0.0461566	0.0413232	0.00200201			0.000112833		0.0394435
Fc epsilon RI signaling pathway	4	7.98989e-06		0.0367401			1.62118e-09	2.43158e-09
TGF-beta signaling pathway	4	0.000126081		0.000164425			8.53416e-13	0.0440461
Intestinal immune network for IgA production	4	0.0458529		1.88738e-05			0.00156993		3.78345e-08
GnRH signaling pathway	3	7.15847e-05					0.000462659	2.83386e-06
Long-term depression	3	0.000574043	0.0352347					0.0439171
Oocyte meiosis	3	0.000858521	0.0271312				0.0217075
B cell receptor signaling pathway	3	0.0010071					1.9221e-07	5.16355e-07
Melanogenesis	3	0.00585334					0.0236841	0.00375245
Gap junction	3	0.0112609	0.0302233					0.000442545
Non-homologous end-joining	3	0.0487559	0.0490864				0.0232248
Dorso-ventral axis formation	2	0.000518416					0.000979715
Long-term potentiation	2	0.000519463						0.013199
Regulation of actin cytoskeleton	2	0.00628066					1.84468e-09
Wnt signaling pathway	2	0.0236534					8.5218e-05
* The number of sets in which a given pathway is enriched
